# Supplementary material
Source: publisher figshare collection journal article supplement (https://sage.figshare.com/ndownloader/files/18169643)
Supplement: Supplementary file 1 [file 18169643]

## Supplemental File

Table A. Selection check: Probability of being the survey respondent

|                              | Dual Earners   |                   | All Couples       |                   |
|------------------------------|----------------|-------------------|-------------------|-------------------|
|                              | (1)            | (3)               | (5)               | (7)               |
| Wife's relative income (WRI) | 0.700 (0.511)  | -0.316 (0.540)    | -0.204 (0.234)    | -0.473 (0.250)    |
| Husband's age                | -0.001 (0.028) | -0.126*** (0.034) | -0.047 (0.025)    | -0.052 (0.027)    |
| Husband's education (grades) | 0.036 (0.075)  | 0.555*** (0.072)  | 0.307*** (0.055)  | 0.340*** (0.061)  |
| Wife's age                   | -0.025 (0.029) | 0.077* (0.033)    | -0.006 (0.025)    | -0.004 (0.027)    |
| Wife's education (grades)    | -0.068 (0.055) | -0.158* (0.068)   | -0.169*** (0.042) | -0.173*** (0.043) |
| Couple has children (=1)     | -0.521 (0.275) | -0.793* (0.337)   | -0.571** (0.208)  | -0.585** (0.221)  |
| Age of youngest child        | 0.042* (0.020) | 0.054* (0.024)    | -0.001 (0.015)    | 0.005 (0.016)     |
| Husband's housework          |                | 0.140*** (0.012)  |                   | 0.119*** (0.010)  |
| Wife's housework             |                | -0.096*** (0.009) |                   | -0.025*** (0.005) |
| Constant                     | 2.264* (1.058) | -5.656*** (1.213) | -5.324*** (0.830) | -5.915*** (0.926) |
| <i>n</i>                     | 4,440          | 4,440             | 6,035             | 6,035             |
| <i>N</i>                     | 11,906         | 11,906            | 19,688            | 19,688            |

Standard errors in parentheses

\*  $p < 0.05$ , \*\*  $p < 0.01$ , \*\*\*  $p < 0.001$

Table B. Robustness Check: Husbands income, work hours, pre-divorce.

|                                                                              | Baseline:<br>Respondent:<br>Husband vs Wife | Robustness Checks          |                      |                    |                    |                                         |
|------------------------------------------------------------------------------|---------------------------------------------|----------------------------|----------------------|--------------------|--------------------|-----------------------------------------|
|                                                                              | (1)                                         | Husband's<br>income<br>(2) | Working hours<br>(3) | Pre-divorce<br>(4) | Pre-divorce<br>(5) | Working hours<br>and pre-divorce<br>(6) |
| Husband respondent [=1]                                                      | -0.172* (0.085)                             | -0.171* (0.085)            | -0.075 (0.162)       | -0.155 (0.090)     | -0.168 (0.098)     | -0.064 (0.164)                          |
| Cohabiting [=1]                                                              | 0.129*** (0.039)                            | 0.129*** (0.039)           | 0.101 (0.077)        | 0.114** (0.043)    | 0.136** (0.048)    | 0.107 (0.080)                           |
| Wife respondent * WRI                                                        | -0.631** (0.239)                            | -0.575* (0.240)            | -0.235 (0.464)       | -0.601* (0.252)    | -0.764** (0.279)   | -0.262 (0.468)                          |
| Husband respondent * WRI                                                     | -0.813** (0.296)                            | -0.734* (0.298)            | -1.069 (0.637)       | -0.784* (0.319)    | -0.910** (0.345)   | -1.153 (0.638)                          |
| Wife respondent * WRI <sup>2</sup>                                           | 0.669* (0.266)                              | 0.415 (0.285)              | 0.617 (0.528)        | 0.667* (0.283)     | 0.827* (0.317)     | 0.648 (0.531)                           |
| Husband respondent * WRI <sup>2</sup>                                        | 1.092*** (0.326)                            | 0.805* (0.345)             | 1.712** (0.628)      | 1.041** (0.348)    | 1.252*** (0.371)   | 1.808** (0.627)                         |
| Total household income (log)                                                 | -0.075** (0.028)                            |                            | -0.082 (0.057)       | -0.056 (0.028)     | -0.045 (0.030)     | -0.074 (0.057)                          |
| Husband's income (log)                                                       |                                             | -0.071** (0.024)           |                      |                    |                    |                                         |
| Wife's work hours                                                            |                                             |                            | -0.004 (0.002)       |                    |                    | -0.005* (0.002)                         |
| Husband's work hours                                                         |                                             |                            | 0.004 (0.002)        |                    |                    | 0.003 (0.002)                           |
| Couple divorces by next survey wave [=1]                                     |                                             |                            |                      | 0.116 (0.092)      | 0.137 (0.099)      | 0.330 (0.175)                           |
| Couple divorces after next survey wave<br>and before the following wave [=1] |                                             |                            |                      |                    | 0.024 (0.114)      | -0.317 (0.027)                          |
| Constant                                                                     | 2.515*** (0.272)                            | 2.465*** (0.241)           | 2.244*** (0.537)     | 2.302*** (0.282)   | 2.156*** (0.306)   | 2.055*** (0.535)                        |
| <i>Control variables</i>                                                     |                                             |                            |                      |                    |                    |                                         |
| Demographics                                                                 | Included                                    | Included                   | Included             | Included           | Included           | Included                                |
| Children, whether and age of youngest                                        | Included                                    | Included                   | Included             | Included           | Included           | Included                                |
| Total household income and wealth (log)                                      | Included                                    | Included                   | Included             | Included           | Included           | Included                                |
| Spousal housework contribution                                               | Included                                    | Included                   | Included             | Included           | Included           | Included                                |
| Husband's and wife's physical health                                         | Included                                    | Included                   | Included             | Included           | Included           | Included                                |
| <i>n</i>                                                                     | 4,440                                       | 4,440                      | 2,345                | 4,244              | 3,732              | 2,283                                   |
| <i>N</i>                                                                     | 11,906                                      | 11,906                     | 3,254                | 10,350             | 8,431              | 3,178                                   |

Standard errors in parentheses

\*  $p < 0.05$ , \*\*  $p < 0.01$ , \*\*\*  $p < 0.001$

Table C. Husband's Income Comparison to other Men

|                                                               | Baseline:<br>Respondent:<br>Husband vs Wife | Husband's Income Comparison to other Men |                                       |                      |                                       |
|---------------------------------------------------------------|---------------------------------------------|------------------------------------------|---------------------------------------|----------------------|---------------------------------------|
|                                                               | (1)                                         | Pooled<br>(2)                            | Respondent:<br>Husband vs Wife<br>(3) | Pooled<br>(4)        | Respondent:<br>Husband vs Wife<br>(5) |
| Husband respondent [=1]                                       | -0.172* (0.085)                             | -0.162*** (0.031)                        | -0.173* (0.085)                       | -0.161*** (0.031)    | -0.167* (0.085)                       |
| Cohabiting [=1]                                               | 0.129*** (0.039)                            | 0.133*** (0.039)                         | 0.131*** (0.039)                      | 0.136*** (0.039)     | 0.134*** (0.039)                      |
| Wife's relative income (WRI)                                  |                                             | -0.653*** (0.191)                        |                                       | -0.669*** (0.190)    |                                       |
| Wife's relative income squared (WRI <sup>2</sup> )            |                                             | 0.580* (0.256)                           |                                       | 0.587* (0.224)       |                                       |
| Wife respondent * WRI                                         | -0.631** (0.239)                            |                                          | -0.573* (0.241)                       |                      | -0.578* (0.240)                       |
| Husband respondent * WRI                                      | -0.813** (0.296)                            |                                          | -0.739* (0.298)                       |                      | -0.768** (0.298)                      |
| Wife respondent * WRI <sup>2</sup>                            | 0.669* (0.266)                              |                                          | 0.408 (0.304)                         |                      | 0.400 (0.284)                         |
| Husband respondent * WRI <sup>2</sup>                         | 1.092*** (0.326)                            |                                          | 0.803* (0.359)                        |                      | 0.821* (0.345)                        |
| <b>Husband's income (log) – Mincer predicted income (log)</b> |                                             | <b>-0.075* (0.037)</b>                   | <b>-0.072* (0.037)</b>                |                      |                                       |
| Total household income (log)                                  | -0.075** (0.028)                            | -0.011 (0.043)                           | -0.013 (0.043)                        |                      |                                       |
| <b>Mincer predicted income (log)</b>                          |                                             |                                          |                                       | <b>0.185 (0.099)</b> | <b>0.187 (0.100)</b>                  |
| Husband's income (log)                                        |                                             |                                          |                                       | -0.080*** (0.024)    | -0.078*** (0.024)                     |
| Constant                                                      | 2.515*** (0.272)                            | 1.983*** (0.382)                         | 2.007*** (0.384)                      | 1.045 (0.805)        | 1.016 (0.810)                         |
| <i>Control variables</i>                                      |                                             |                                          |                                       |                      |                                       |
| Demographics                                                  | Included                                    | Included                                 | Included                              | Included             | Included                              |
| Children, whether and age of youngest                         | Included                                    | Included                                 | Included                              | Included             | Included                              |
| Total household income and wealth (log)                       | Included                                    | Included                                 | Included                              | Included             | Included                              |
| Spousal housework contribution                                | Included                                    | Included                                 | Included                              | Included             | Included                              |
| Husband's and wife's physical health                          | Included                                    | Included                                 | Included                              | Included             | Included                              |
| <i>n</i>                                                      | 4,440                                       | 4,440                                    | 4,440                                 | 4,440                | 4,440                                 |
| <i>N</i>                                                      | 11,906                                      | 11,906                                   | 11,906                                | 11,906               | 11,906                                |

Standard errors in parentheses

\*  $p < 0.05$ , \*\*  $p < 0.01$ , \*\*\*  $p < 0.001$

Table D. Robustness Check: Fixed Effects Linear Regression

|                                                    | Baseline:<br>Respondent:<br>Husband vs Wife | Fixed effects linear regression<br>Respondent:<br>Husband vs<br>Wife | Only wife<br>respondents | Only husband<br>respondents | WRI<0.71         |
|----------------------------------------------------|---------------------------------------------|----------------------------------------------------------------------|--------------------------|-----------------------------|------------------|
|                                                    | (1)                                         | (2)                                                                  | (3)                      | (4)                         | (5)              |
| Husband respondent [=1]                            | -0.172* (0.085)                             | -0.086 (0.355)                                                       |                          |                             | -0.034 (0.388)   |
| Cohabiting [=1]                                    | 0.129*** (0.039)                            | 0.505* (0.206)                                                       | 0.179 (0.317)            | 0.752** (0.246)             | 0.570** (0.210)  |
| Wife's relative income (WRI)                       |                                             |                                                                      | -1.289 (0.933)           | -3.534*** (0.948)           |                  |
| Wife's relative income squared (WRI <sup>2</sup> ) |                                             |                                                                      | 1.333 (1.001)            | 3.964*** (1.020)            |                  |
| Wife respondent * WRI                              | -0.631** (0.239)                            | -1.276 (0.903)                                                       |                          |                             | -1.424 (1.239)   |
| Husband respondent * WRI                           | -0.813** (0.296)                            | -3.044** (0.987)                                                     |                          |                             | -3.466* (1.366)  |
| Wife respondent * WRI <sup>2</sup>                 | 0.669* (0.266)                              | 1.462 (0.962)                                                        |                          |                             | 1.631 (1.635)    |
| Husband respondent * WRI <sup>2</sup>              | 1.092*** (0.326)                            | 3.440** (1.067)                                                      |                          |                             | 4.640* (1.975)   |
| Total household income (log)                       | -0.075** (0.028)                            | -0.146 (0.104)                                                       | -0.191 (0.156)           | -0.156 (0.130)              |                  |
| Constant                                           | 2.515*** (0.272)                            | 5.895*** (1.345)                                                     | 5.622** (2.133)          | 6.526*** (1.650)            | 6.601*** (1.385) |
| <i>Control variables</i>                           |                                             |                                                                      |                          |                             |                  |
| Demographics                                       | Included                                    | Included                                                             | Included                 | Included                    | Included         |
| Children, whether and age of youngest              | Included                                    | Included                                                             | Included                 | Included                    | Included         |
| Total household income and wealth (log)            | Included                                    | Included                                                             | Included                 | Included                    | Included         |
| Spousal housework contribution                     | Included                                    | Included                                                             | Included                 | Included                    | Included         |
| Husband's and wife's physical health               | Included                                    | Included                                                             | Included                 | Included                    | Included         |
| <i>n</i>                                           | 4,440                                       | 4,440                                                                | 2,720                    | 2,015                       | 4,315            |
| <i>N</i>                                           | 11,906                                      | 11,906                                                               | 6,851                    | 5,055                       | 11,322           |

Standard errors in parentheses

\*  $p < 0.05$ , \*\*  $p < 0.01$ , \*\*\*  $p < 0.001$

Table E. Multicollinearity Check: Fixed Effects Linear Regression and Variance Inflation Factor

|                                                     | Fixed effects linear regression       |      |                                 |      |                                    |      |                  |      |
|-----------------------------------------------------|---------------------------------------|------|---------------------------------|------|------------------------------------|------|------------------|------|
|                                                     | Respondent:<br>Husband vs Wife<br>(2) | VIF  | Only wife<br>respondents<br>(3) | VIF  | Only husband<br>respondents<br>(4) | VIF  | WRI<0.71<br>(5)  | VIF  |
| Husband respondent [=1]                             | -0.380 (0.213)                        | 3.46 |                                 |      |                                    |      | -0.338 (0.221)   | 3.66 |
| Cohabiting [=1]                                     | 0.505* (0.206)                        | 1.17 | 0.179 (0.317)                   | 1.16 | 0.752** (0.246)                    | 1.19 | 0.570** (0.210)  | 1.16 |
| Wife's relative income (WRI0)                       |                                       |      | -0.700 (0.547)                  | 6.33 | -1.783*** (0.554)                  | 6.44 |                  |      |
| Wife's relative income squared (WRI0 <sup>2</sup> ) |                                       |      | 1.333 (1.001)                   | 4.95 | 3.964*** (1.020)                   | 4.96 |                  |      |
| Wife respondent * WRI0                              | -0.630 (0.903)                        | 6.17 |                                 |      |                                    |      | -0.703 (0.597)   | 5.79 |
| Husband respondent * WRI0                           | -1.525** (0.575)                      | 6.08 |                                 |      |                                    |      | -1.417* (0.606)  | 5.66 |
| Wife respondent * WRI0 <sup>2</sup>                 | 1.462 (0.962)                         | 4.90 |                                 |      |                                    |      | 1.631 (1.635)    | 5.73 |
| Husband respondent * WRI0 <sup>2</sup>              | 3.440*** (1.067)                      | 4.82 |                                 |      |                                    |      | 4.640* (1.975)   | 5.56 |
| Constant                                            | 5.685*** (1.345)                      |      | 5.403* (2.133)                  |      | 5.939*** (1.650)                   |      | 6.366*** (1.385) |      |
| <i>Control variables</i>                            |                                       |      |                                 |      |                                    |      |                  |      |
| Demographics                                        | Included                              |      | Included                        |      | Included                           |      | Included         |      |
| Children, whether and age of youngest               | Included                              |      | Included                        |      | Included                           |      | Included         |      |
| Total household income and wealth (log)             | Included                              |      | Included                        |      | Included                           |      | Included         |      |
| Spousal housework contribution                      | Included                              |      | Included                        |      | Included                           |      | Included         |      |
| Husband's and wife's physical health                | Included                              |      | Included                        |      | Included                           |      | Included         |      |
| <i>n</i>                                            | 4,440                                 |      | 2,720                           |      | 2,015                              |      | 4,315            |      |
| <i>N</i>                                            | 11,906                                |      | 6,851                           |      | 5,055                              |      | 11,322           |      |

Standard errors in parentheses

\*  $p < 0.05$ , \*\*  $p < 0.01$ , \*\*\*  $p < 0.001$ 

WRI0 – WRI centered at the mean
